# Supplementary material
Source: MDPI journal article supplement (https://www.mdpi.com/1999-4907/10/3/209)
Supplement: s1 [file s1]

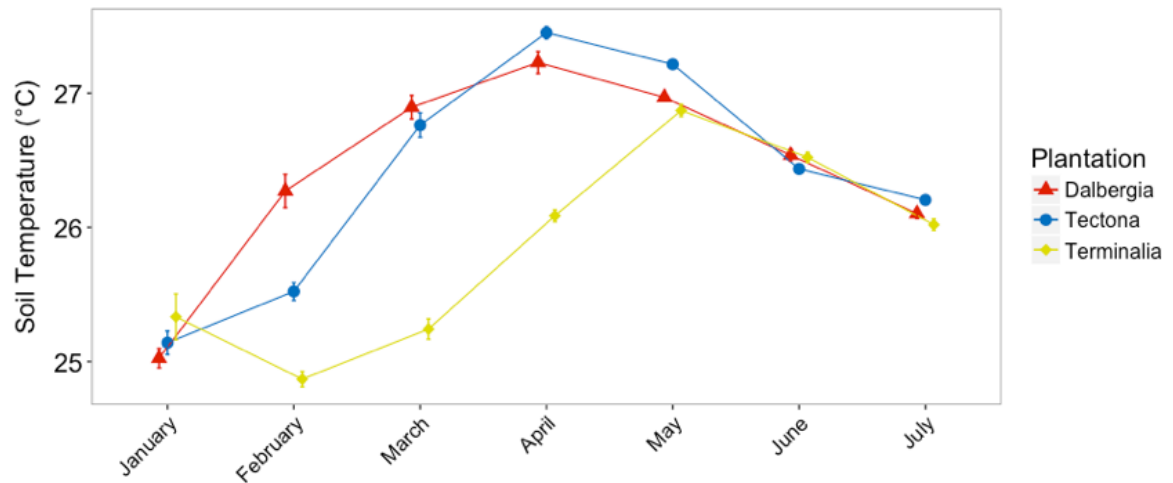

**Figure S1.** Soil temperature in monoculture plantations of *Tectona grandis* (blue circles), *Dalbergia retusa* (red triangles) and *Terminalia amazonia* (yellow diamonds) during a litter decomposition experiment in the Agua Salud project in Panama. The measurements were taken for each mesocosm ( $n = 7$  per block from January until April 2017 and  $n = 7$  per block from May until July 2017) every month during 7 months.

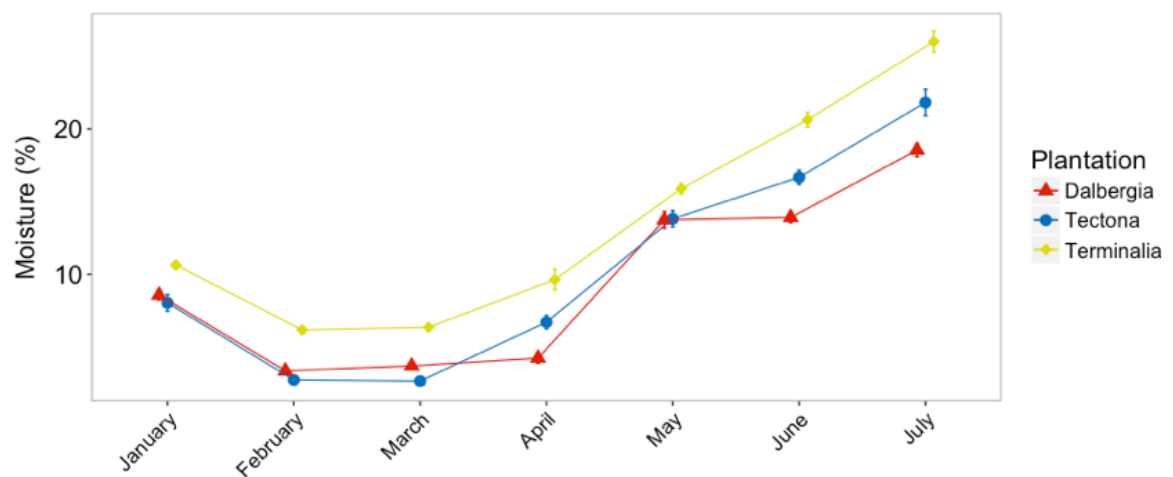

**Figure S2.** Soil moisture in monoculture plantations of *Tectona grandis* (blue circles), *Dalbergia retusa* (red triangles) and *Terminalia amazonia* (yellow diamonds) during a litter decomposition experiment in the Agua Salud project in Panama. The measurements were taken for each mesocosm ( $n = 7$  per block from January until April 2017 and  $n = 7$  per block from May until July 2017) every month during 7 months.
